# Supplementary material for: Novel Bacteroides Vulgatus strain protects against gluten-induced break of human celiac gut epithelial homeostasis: a pre-clinical proof-of-concept study
Source: Springer Nature journal article supplement (doi:10.1038/s41390-023-02960-0), 2024-01-04

## SUPPLEMENTAL DATA

### METHODS

#### Bacterial isolation

Bacterial cell suspensions were added to an array with over 6,000 microwells (designed to act as single cell occupancy growth changes), which was then sealed with a gas permeable membrane and incubated to allow for clonal proliferation. Metabolic activity was monitored with redox indicator and fluorescence imaging. The Prospector software was then used to analyze the images, generate the transfer lists, and drive the automated, aseptic transfer of bacterial cells from array to a standard multi-well plate. A biobank of isolated bacterial strains was generated for whole genomic sequencing and functional studies.

#### Bacterial growth culture conditions

Several culture media were used, including Robertson's Cooked Meat (RCM) medium, Yeast Casitone Fatty Acids Broth with Carbohydrates (YCFAC BROTH), Peptone Yeast Glucose (PYG) Broth, and Brain Heart Infusion (BHI) Broth to find the ideal culture conditions for the bacteria to be cultivated. The bacterial strains of interest are all anaerobic; thus, cultures were prepared in an anaerobic chamber in order to avoid exposure to oxygen. After identifying the five strains of interest in the microwells, a small amount of bacteria was obtained from the microwell using a sterile inoculation loop and placed into a different deep microwell plate containing the different bacterial culture media. The five strains that were selected include *Bifidobacterium breve*, *Bacteroides thetaiotaomicron*, *Bifidobacterium longum*, *Bacteroides uniformis*, and *Bacteroides vulgatus*. The liquid cultures were allowed to incubate at 37°C for 24 hours in an anaerobic chamber. After the 24-hour incubation period, cultures were quantified by measuring the optical density at 600 nm (OD<sub>600</sub>). The reported OD<sub>600</sub> readings are the following: 0.081 for *Bifidobacterium breve*, 0.6078 for *Bacteroides thetaiotaomicron*, 0.127 for *Bifidobacterium longum*, 0.6618 for *Bacteroides uniformis*, and 0.8283 for *Bacteroides vulgatus*. Subcultures were then collected, centrifuged at 4000 rpm, and the supernatants were then filtered successively through a 0.4 µm and a 0.2 µm syringe filter. The cell free

supernatants (CFS) were frozen at -80.0°C for future use while pellets were flash frozen for genomic DNA sequencing.

#### Bacterial sequencing and mutation analysis

*Pruning and functional categorization of mutated genes:* The list of over 20,000 mutations identified in our isolated *B. vulgatus*-A2 strain compared to the *B. vulgatus* ATCC 8482 reference strain was reviewed. Areas of missing coverage, unassigned new junctions, silent mutations, and intergenic mutations as well as additional selected genes were removed based on annotation describing their involvement in DNA or RNA processing (such as rRNAs or tRNAs). A complete list of SeqCenter annotations for these removed genes is reported in **Supplementary Figure S1**. The remaining genes with mutations were then analyzed for functional categorization. Genes with multiple mutations were counted once and the list of resulting 1,342 mutated genes was searched via UniProt online database and then categorized as bacterial barrier function, metabolism, cell replication and turnover, inflammation when interacting with host, a combination of the prior categories, or unknown.

*Automated literature search of mutated genes:* We developed an automated search tool based on the pypubmed tool (<https://pypi.org/project/pypubmed/>) to access the PubMed API and search if any of the 1,342 mutated genes in our isolated *B. vulgatus*-A2 strain has been reported to be implicated in interactions with host. We used this tool to iteratively search each mutated gene by using the following keywords combinations: gene + “bacteroides” + “vulgatus” + ((immune response) OR (gut barrier) OR (inflammation)).

#### Establishing organoid-macrophages co-culture model

For this work, we utilized duodenal tissue to derive organoids at two timepoints from PCeD1 and subsequently when diagnosed with CD one year later. We also generated a second set of PCeD organoids from another patient who also had elevated serology but did not have histologic evidence of CeD (PCeD2). Healthy control organoids were from the Center for Celiac Research organoid biorepository MGHfC [52]. Organoids derived monolayers were generated as previously done [52] and monitored for confluence via light microscope and transepithelial electrical resistance (TEER, as described below) upon media changes every other day [41]. Confluence was achieved by day 8-10.

Macrophages (MΦ) derived from circulating monocytes were employed to establish the organotypic coculture, with methodological details are reported in the supplement section. The MΦ were resuspended in RPMI-1640 Medium (#R8758, Sigma Aldrich, Burlington, MA) supplemented with heat-inactivated Fetal Bovine Serum (#F4135, Sigma Aldrich, Burlington, MA) and Animal-Free Recombinant Human M-CSF (#AF-300-25, Peprotech, Cranbury, NJ), and plated at 55,000 cells per well in a 96 well tissue culture-treated high throughput screening receiver plate (#3382, Corning, Tewksbury, MA). The culture medium was changed every three to four days. After seven days in culture, the culture medium was removed and the MΦ were rinsed with DMEM/F12.

A 96 TW plate containing differentiated organoid-derived monolayers was placed on top of the receiver plate containing the MΦ, thus establishing the macrophage-epithelium organotypic model. For some comparative analyses, we had a 96 well receiver plate with only MΦ as control. After 24 hours, the permeability and cytotoxicity of the macrophage-epithelium organotypic model were measured. Gene expression analysis was performed on the MΦ from the organotypic model.

#### Organoid monolayer microRNAs analysis

cDNA was prepared using miRCURY® LNA® RT Kit (Cat. #: 339340, QIAGEN, Hilden, Germany) and used to perform a high throughput molecular analysis on 96-well plates of the “Human Inflammatory Response & Autoimmunity Focus” miRCURY LNA miRNA PCR Panel (cat #: YAHS-205Z, QIAGEN, Hilden, Germany). Real-time PCR reactions were run on AB 7500 System instrument (Applied Biosystems, Foster City, CA) according to manufacturer’s instructions (n = 3 for each experimental group). Following quality control test, data were normalized using NormFinder as algorithm on GeneGlobe software from QIAGEN. The relative expression of all tested miRNAs was calculated using the  $2^{-\Delta\Delta C_t}$  method and was reported as fold regulation. The prediction of miRNAs targets and the gene set enrichment analysis of the predicted targets were performed for the significantly modulated miRNAs using TargetScan and Enrichr (using KEGG 2021 human database), respectively.

## **RESULTS**

### **Gut organoid-MΦ co-culture**

While most of MΦ migrate in tissues early during embryogenesis and develop locally, intestinal MΦ are constantly replenished from circulating monocytes even at steady state [53], suggesting both a different ontogeny of these cells from their resident counterparts in other tissues and the possible influence of environmental factors in promoting their differentiation. To evaluate the effect of “epithelial micromilieu” on MΦ differentiation, we evaluated multiple markers known to be differentially expressed in intestinal versus circulating monocytes including CD14, CD89, CD32 and CD64 [54]. We found that MΦ differentiated from monocytes from a healthy donor had reduced the expression of CD14 and CD64 when cultured with either organoid monolayers from HC or PCeD for 24h (**Supplementary Figure S2**) compared to MΦ alone, whereas CD32 and CD89 were below detection levels (data not shown). These data are in line with evidence supporting that the intestinal monolayer [55] contributes to the MΦ makeup toward a specific gut phenotype [54], and validate the use of the macrophage-organoid co-culture as a relevant organotypic model to study the interaction between epithelium-immune cells and environmental stimuli.

### ***B. vulgatus*-A2 sequencing and genomic analysis**

Examples of additional mutations in our *B. vulgatus*-A2 that may alter host-microbe interactions include: (i) a peptidoglycan hydrolase that activate host immune pathways to enhance epithelial barrier integrity (A6L2T7); (ii) the outer membrane TonB receptor family protein that polarizes host macrophages into the M2 state (A6KWM3); (iii) a conserved protein found in conjugate transposon involved in antagonistic secretion systems to aid in *Bacteroides* inter-strain competition (A6L0P3); and (iv) S-ribosylhomocysteine lyase, which helps synthesize the secreted autoinducer 2 (AI-2) used in quorum sensing, biofilm formation, and virulence factor expression (A6KYS6) [56-59]. The strain might additionally alter the intestinal microenvironment due to a mutation in an outer membrane protein involved in bile acid deconjugation (A6L4A1) or iron chelation via a ferrous iron transport protein B that associated with reduction in inflammation in ulcerative colitis patients (A6L4B2) [60-62].

## SUPPLEMENTAL TABLES AND FIGURES

**Supplemental Table ST1:** The oligonucleotide primers used for the RT-PCR analysis

| Gene   | Forward                | Reverse                 |
|--------|------------------------|-------------------------|
| 18S    | AGAAACGGCTACCACATCCA   | CCCTCCAATGGATCCTCGTT    |
| CCL25  | GGCCCTCATGCTGTAAAGAAG  | TGCTGATGGGATTGCTAAACTT  |
| CD14   | ACGCCAGAACCTTGTGAGC    | GCATGGATCTCCACCTCTACTG  |
| CD64   | AGCTGTGAAACAAAGTTGCTCT | GGTCTTGCTGCCCATGTAGA    |
| MUC6   | CTGCCCTATACCAGCAATGGA  | CTGACCCATGTACTTCCGCTC   |
| CLDN18 | ACATGCTGGTGACTAACTTCTG | AAATGTGTACCTGGTCTGAACAG |

**Supplemental Figure S1:** Fold change gene expression analysis of CD14 and CD64 in MΦ co-cultured with healthy controls (1 and 2), and PCeD monolayers and compared to MΦ alone (m-CSF\_MΦ). One-way ANOVA (\*\*\*) $P<.001$ , (\*\*\*\*) $P<.0001$

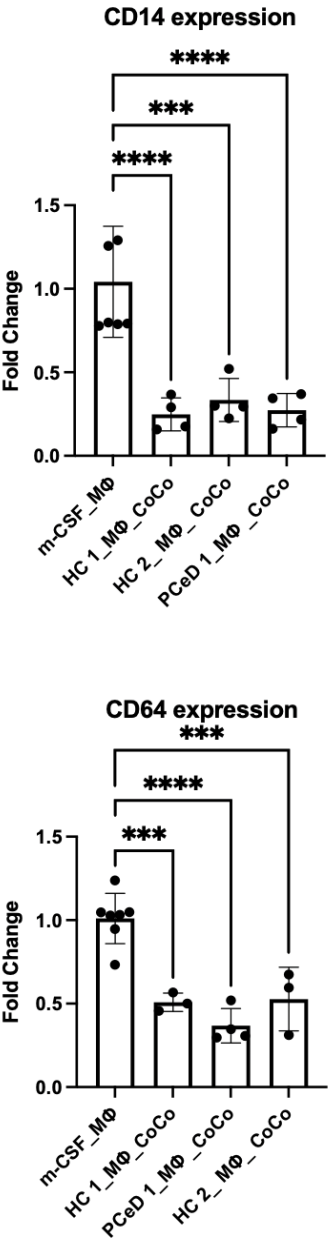

**Supplemental Figure S2:** Paracellular permeability evaluated by passage of FITC-PEG550 across monolayers in PCeD coculture upon 10% CFS treatment before being exposed to PTG[SDS4] for four hours. One-way ANOVA.

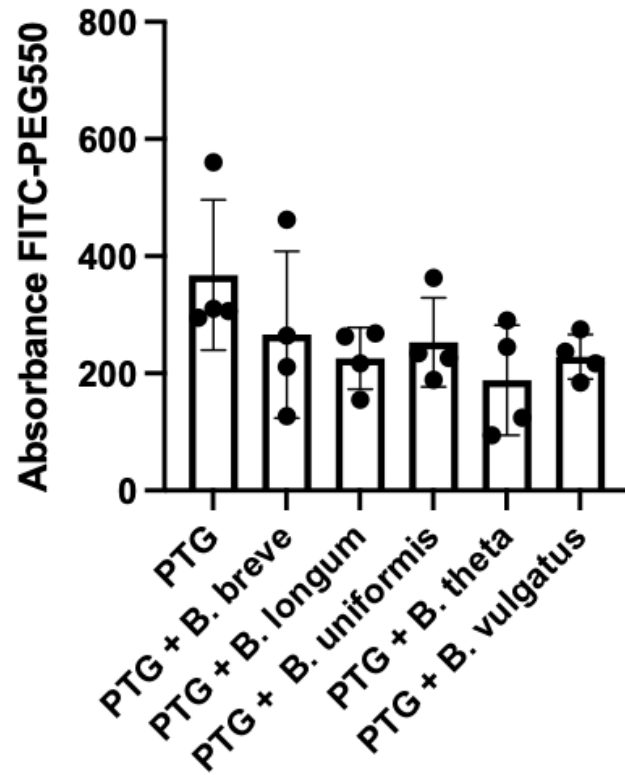

**Supplemental Figure S3: List of additional genetic mutations in *B. vulgatus*-A2 compared to reference strain.** In addition to areas labeled unassigned new junctions, silent mutations, and intergenic mutations selected genes related to 16S and 23S ribosomal RNA, DNA primases, DNA polymerases, RNA polymerases, exonucleases, translocation elements, topoisomerases, helicases, transposases, RNA sigma factors, and tRNAs were from the original variant analysis list, thus generating the list of 1,342 unique genes with mutations mentioned in the body of the article that were manually and computationally analyzed.

16S ribosomal RNA/2TM domain-containing protein  
 16S ribosomal RNA/ABC transporter permease  
 16S ribosomal RNA/hypothetical protein  
 16S rRNA (adenine(1518)-N(6)/adenine(1519)-N(6))- dimethyltransferase RsmA  
 16S rRNA (cytosine(1402)-N(4))-methyltransferase RsmH  
 23S ribosomal RNA  
 23S ribosomal RNA/5S ribosomal RNA  
 23S rRNA (adenine(2503)-C(2))-methyltransferase RlmN  
 23S rRNA (guanosine(2251)-2'-O)-methyltransferase RlmB  
 23S rRNA (uracil(1939)-C(5))-methyltransferase RlmD  
 30S ribosomal protein S1/SIMPL domain-containing protein  
 30S ribosomal protein S10/elongation factor G  
 30S ribosomal protein S15/hypothetical protein  
 3'-5' exonuclease domain-containing protein 2  
 3'-5' exonuclease/DNA polymerase III subunit beta  
 50S ribosomal protein L11 methyltransferase  
 50S ribosomal protein L2  
 50S ribosomal protein L3/30S ribosomal protein S10  
 50S ribosomal protein L34/anaerobic sulfatase-maturation protein  
 5'-methylthioadenosine/adenosylhomocysteine nucleosidase  
 5'-methylthioadenosine/adenosylhomocysteine nucleosidase  
 5S ribosomal RNA/2-isopropylmalate synthase  
 5S ribosomal RNA/2-isopropylmalate synthase  
 cysteine--tRNA ligase  
 cysteine--tRNA ligase/aromatic amino acid ammonia-lyase  
 Cys-tRNA(Pro) deacylase  
 D-aminoacyl-tRNA deacylase/excinuclease ABC subunit UvrC  
 D-aminoacyl-tRNA deacylase/excinuclease ABC subunit UvrC  
 DNA alkylation repair protein  
 DNA gyrase subunit A  
 DNA gyrase subunit A/ATP-dependent Clp protease ATP-binding subunit  
 DNA gyrase subunit A/ATP-dependent Clp protease ATP-binding subunit  
 DNA gyrase subunit A/ATP-dependent Clp protease ATP-binding subunit  
 DNA helicase RecQ/helix-turn-helix domain-containing protein  
 DNA helicase RecQ/helix-turn-helix domain-containing protein  
 DNA polymerase I  
 DNA polymerase III subunit gamma/tau  
 DNA polymerase IV  
 DNA polymerase IV/tRNA-Pro  
 DNA primase  
 DNA primase  
 DNA repair protein RadA/bifunctional aspartate kinase/homoserine dehydrogenase I



DNA repair protein RadC  
DNA repair protein RecN/bifunctional phosphopantothienoylcysteine  
decarboxylase/phosphopantothenate--cysteine ligase CoaBC  
DNA repair protein RecO  
DNA repair protein RecO/GatB/YqeY domain-containing protein  
DNA topoisomerase (ATP-hydrolyzing) subunit B/30S ribosomal protein S20  
DNA topoisomerase 3  
DNA/RNA non-specific endonuclease/alpha-N-arabinofuranosidase  
DNA-directed RNA polymerase subunit alpha  
DNA-directed RNA polymerase subunit omega/DUF4293 domain-containing protein  
DNA-processing protein DprA  
EFR1 family ferredoxin/50S ribosomal protein L20  
endonuclease  
endonuclease MutS2  
endonuclease/exonuclease/phosphatase family protein  
excinuclease ABC subunit UvrA  
excinuclease ABC subunit UvrB  
excinuclease ABC subunit UvrC/adenine phosphoribosyltransferase  
exodeoxyribonuclease III/hypothetical protein  
exodeoxyribonuclease VII small subunit  
exonuclease SbcCD subunit D C-terminal domain-containing protein  
helicase  
helicase/DsbA family protein  
helicase/hypothetical protein  
helicase-related protein/hypothetical protein  
helix-turn-helix domain-containing protein/isoleucine--tRNA ligase  
helix-turn-helix transcriptional regulator/DNA polymerase III subunit delta  
hypothetical protein  
hypothetical protein/50S ribosomal protein L17  
hypothetical protein/50S ribosomal protein L9  
hypothetical protein/5S ribosomal RNA  
IS1182 family transposase  
IS1182 family transposase/GNAT family N-acetyltransferase  
IS1182 family transposase/hypothetical protein  
IS1182 family transposase/TonB-dependent receptor  
IS1595-like element ISBvu2 family transposase  
IS1595-like element ISBvu2 family transposase  
IS1595-like element ISBvu2 family transposase/hypothetical protein  
IS21 family transposase  
IS21 family transposase  
IS21 family transposase/hypothetical protein  
IS256 family transposase  
IS66 family insertion sequence element accessory protein TnpB  
IS66 family insertion sequence element accessory protein TnpB/acyltransferase  
IS66 family insertion sequence element accessory protein TnpB/RagB/SusD family nutrient  
uptake outer membrane protein  
IS66 family transposase/hypothetical protein  
IS982 family transposase/B12-binding domain-containing radical SAM protein  
IS982 family transposase/IS21 family transposase  
IS982 family transposase/phosphoglucosamine mutase  
ISAs1 family transposase

ISAs1 family transposase/ATP-binding protein  
isoleucine--tRNA ligase  
leucine--tRNA ligase  
lysine--tRNA ligase  
methionine--tRNA ligase  
NAAT family transporter/5S ribosomal RNA  
nucleoside-diphosphate kinase/ATP-dependent DNA helicase RecG  
nucleotide exchange factor GrpE  
phenylalanine--tRNA ligase subunit beta  
phosphoribosylaminoimidazolecarboxamide formyltransferase/16S ribosomal RNA  
replicative DNA helicase/phenylalanine--tRNA ligase subunit beta  
restriction endonuclease  
restriction endonuclease subunit M  
restriction endonuclease subunit S  
ribonuclease Z  
ribonucleoside-diphosphate reductase subunit alpha  
ribonucleoside-diphosphate reductase subunit alpha/hypothetical protein  
ribonucleotide-diphosphate reductase subunit beta  
ribonucleotide-diphosphate reductase subunit beta/ribonucleoside-diphosphate reductase subunit alpha  
ribosome maturation factor RimM  
RNA degradosome polyphosphate kinase  
RNA methyltransferase  
RNA methyltransferase/alcohol dehydrogenase  
RNA methyltransferase/outer membrane beta-barrel protein  
RNA polymerase factor sigma-54/Xaa-Pro aminopeptidase  
RNA polymerase sigma factor  
RNA polymerase sigma factor  
RNA polymerase sigma-70 factor  
RNA polymerase sigma factor RpoD/SigA/hypothetical protein  
RNA polymerase sigma-70 factor  
RNA polymerase sigma-70 factor/alpha-galactosidase  
RNA polymerase sigma-70 factor/FecR domain-containing protein  
RNA polymerase sigma-70 factor/GH92 family glycosyl hydrolase  
RNA polymerase sigma-70 factor/ISAs1 family transposase  
RNA polymerase sigma-70 factor/outer membrane beta-barrel protein  
RNA polymerase sigma-70 factor/SusC/RagA family TonB-linked outer membrane protein  
RNase P RNA component class A  
RNase P RNA component class A/chaperone modulator CbpM  
Rne/Rng family ribonuclease/N-acetylmuramoyl-L-alanine amidase  
Rpn family recombination-promoting nuclease/putative transposase  
Rpn family recombination-promoting nuclease/putative transposase/30S ribosomal protein S16  
rRNA cytosine-C5-methyltransferase  
rRNA maturation RNase YbeY  
S-adenosylmethionine:tRNA ribosyltransferase-isomerase  
sel1 repeat family protein/sigma-54 dependent transcriptional regulator  
sigma-54 dependent transcriptional regulator  
sigma-54 dependent transcriptional regulator/glycine betaine/L-proline ABC transporter  
ATP-binding protein  
sigma-70 family RNA polymerase sigma factor  
sigma-70 family RNA polymerase sigma factor/DUF4974 domain-containing protein

sigma-70 family RNA polymerase sigma factor/glycoside hydrolase 43 family protein  
 sigma-70 family RNA polymerase sigma factor/NigD-like protein  
 sigma-70 family RNA polymerase sigma factor/ROK family transcriptional regulator  
 single-stranded DNA-binding protein  
 site-specific integrase  
 site-specific integrase/AraC family transcriptional regulator  
 site-specific integrase/Holliday junction branch migration DNA helicase RuvB  
 site-specific integrase/hypothetical protein  
 site-specific integrase/site-specific integrase  
 site-specific integrase/TonB-dependent receptor  
 site-specific integrase/transcriptional regulator  
 threonine--tRNA ligase  
 TIGR03915 family putative DNA repair protein  
 transcription-repair coupling factor  
 transcription-repair coupling factor/TonB family protein  
 translocation/assembly module TamB  
 translocation/assembly module TamB domain-containing protein  
 transposase  
 transposase/hypothetical protein  
 transposase/IS21 family transposase  
 transposase/IS66 family insertion sequence element accessory protein TnpB  
 transposase/tRNA-Leu  
 tRNA (5-methylaminomethyl-2-thiouridine)(34)-methyltransferase MnmD  
 tRNA (5-methylaminomethyl-2-thiouridine)(34)-methyltransferase MnmD/hypothetical protein  
 tRNA (adenosine(37)-N6)-dimethylallyltransferase MiaA  
 tRNA (adenosine(37)-N6)-threonylcarbamoyltransferase complex ATPase subunit type 1 TsaE  
 tRNA (guanosine(37)-N1)-methyltransferase TrmD  
 tRNA (guanosine(37)-N1)-methyltransferase TrmD/dihydroorotate dehydrogenase  
 tRNA (N(6)-L-threonylcarbamoyladenosine(37)-C(2))- methylthiotransferase MtaB  
 tRNA (N(6)-L-threonylcarbamoyladenosine(37)-C(2))- methylthiotransferase MtaB/long-chain  
 fatty acid--CoA ligase  
 tRNA 2-thiocytidine biosynthesis TtcA family protein/PD40 domain-containing protein  
 tRNA 2-thiouridine(34) synthase MnmA  
 tRNA dihydrouridine synthase DusB  
 tRNA dihydrouridine synthase DusB/DUF2807 domain-containing protein  
 tRNA lysidine(34) synthetase TilS  
 tRNA lysidine(34) synthetase TilS/tetratricopeptide repeat protein  
 tRNA pseudouridine(38-40) synthase TruA  
 tRNA uridine-5-carboxymethylaminomethyl(34) synthesis enzyme MnmG  
 tRNA uridine-5-carboxymethylaminomethyl(34) synthesis GTPase MnmE  
 tRNA uridine-5-carboxymethylaminomethyl(34) synthesis GTPase MnmE/hypothetical protein  
 tRNA-Arg/4-hydroxy-tetrahydrodipicolinate synthase  
 tRNA-Arg/left-handed beta-roll domain-containing protein  
 tRNA-Asn/hybrid sensor histidine kinase/response regulator transcription factor  
 tRNA-Asn/tRNA-Asn  
 tRNA-Asp/tRNA-Asp  
 tRNA-Cys/ferrous iron transport protein B  
 tRNA-dihydrouridine synthase family protein  
 tRNA-dihydrouridine synthase family protein/DUF3874 domain-containing protein  
 tRNA-Gln/DUF349 domain-containing protein  
 tRNA-Gln/flavin reductase

tRNA-Glu/DcaP family trimeric outer membrane transporter  
tRNA-Glu/DNA repair protein RecO  
tRNA-Glu/tRNA-Ser  
tRNA-Gly/hypothetical protein  
tRNA-Leu  
tRNA-Leu/DUF5110 domain-containing protein  
tRNA-Leu/tRNA-Gly  
tRNA-Leu/tRNA-Leu  
tRNA-Lys  
tRNA-Lys  
tRNA-Lys/Al-2E family transporter  
tRNA-Lys/magnesium/cobalt transporter CorA  
tRNA-Met/tRNA-Met  
tRNA-Pro/tRNA-Phe  
tRNA-Ser/DNA polymerase III subunit gamma/tau  
tRNA-Ser/glycosyltransferase  
tRNA-Ser/hypothetical protein  
tRNA-Thr/DEAD/DEAH box helicase  
type I DNA topoisomerase  
type I restriction endonuclease subunit R  
type I restriction enzyme HsdR N-terminal domain-containing protein/C4-type zinc ribbon  
domain-containing protein  
type I restriction-modification system subunit M  
tyrosine-type recombinase/integrase  
type II pantothenate kinase/5S ribosomal RNA  
U32 family peptidase  
uracil-DNA glycosylase  
uracil-DNA glycosylase family protein  
UvrD-helicase domain-containing protein  
valine--tRNA ligase  
YccF domain-containing protein/50S ribosomal protein L11 methyltransferase  
response regulator/IS66 family transposase  
CCA tRNA nucleotidyltransferase

**Supplemental Figure S4:** Functional categorization of the 1,342 mutated genes in our isolated *B. vulgatus*-A2 according to UniProt annotations.

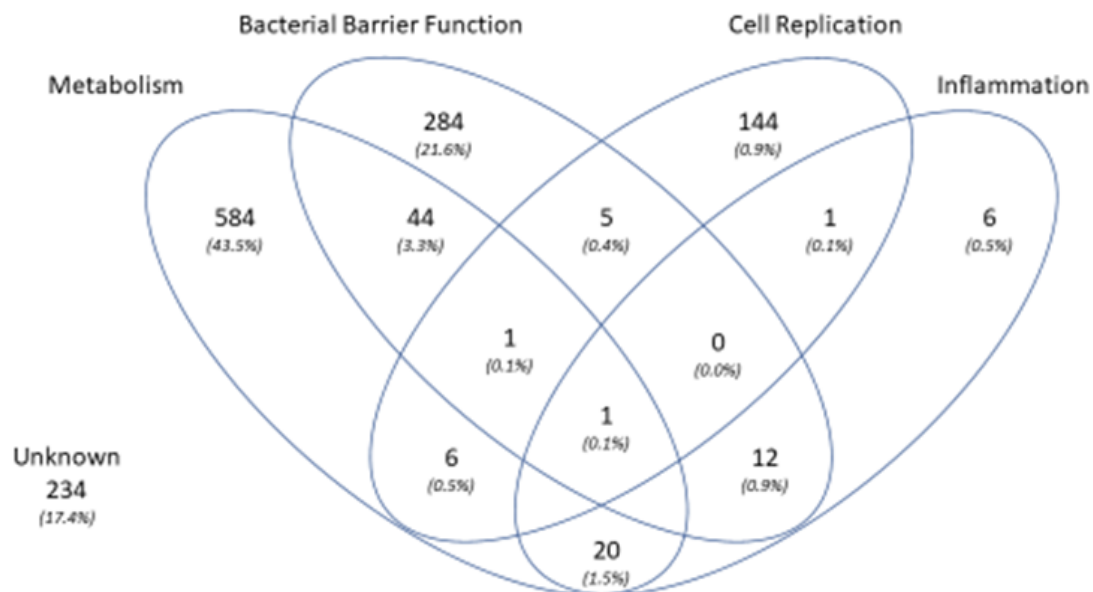

**Supplemental Figure S5.** Effect of *B. vulgatus*-A2 CFS on let-7c-5p expression in HC organoids. High-throughput miRNAs analysis was performed by Real-Time PCR in *B. vulgatus*-A2 CFS-treated HC organoids (white bars) vs. untreated HC organoids (black bars) using pre-custom plates for the inflammatory response and the autoimmunity focus (n = 3 organoids derived monolayers/group). Histograms represent the mean  $\pm$  SEM. \*\*\*\*P < 0.0001.

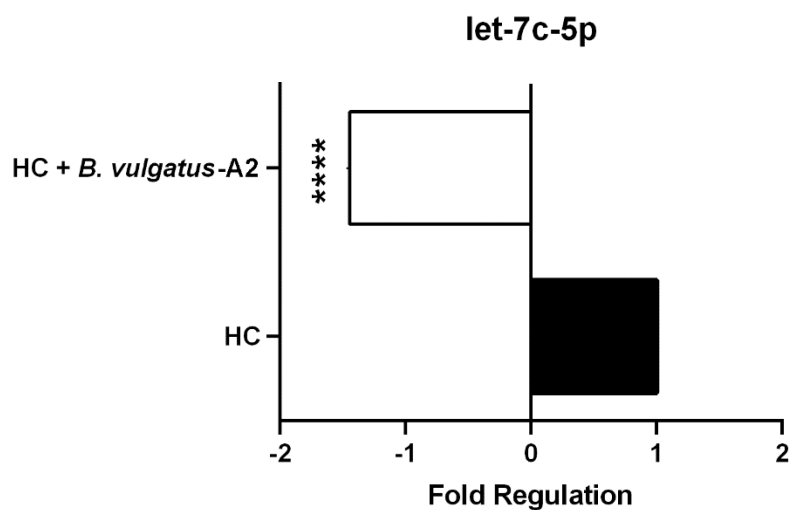

**Supplemental Figure S6.** Gene set enrichment analysis of the predicted miRNA targets was performed by Enrichr using KEGG 2021 human database - bars were sorted by the p-value ranking. The preliminary target prediction was done by TargetScan for the miRNAs resulted to be significantly modulated by a high-throughput Real-Time PCR analysis using pre-custom plates for the inflammatory response and the autoimmunity focus in PCeD and HC organoids with and without *B. vulgatus*-A2 CFS treatment.

### let-7-5p

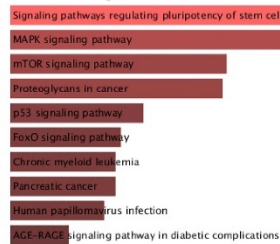

### miR-128-3p

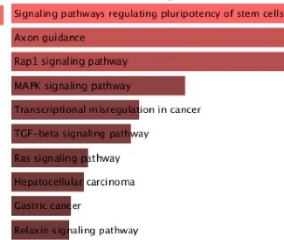

### miR-15-5p

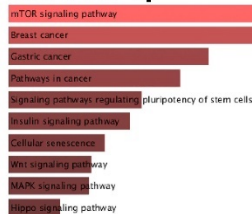

### miR-145-5p

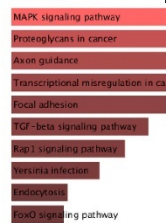

### miR-146-5p

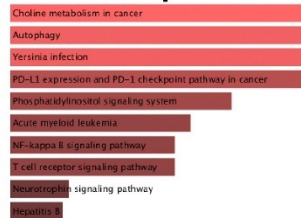

### miR-152-3p

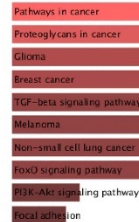

### miR-223

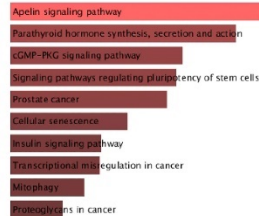

Supplement: MOESM1 [file 41390_2023_2960_MOESM1_ESM.pdf]
